# Supplementary material
Source: publisher figshare collection journal article supplement (https://karger.figshare.com/ndownloader/files/8956264)
Supplement: Supplementary file 1 [file 8956264]

## Erratum

---

In the article by Billings FT, Yu C, Byrne JG, Petracek MR and Pretorius M, entitled 'Heme oxygenase-1 and acute kidney injury following cardiac surgery' [Cardiorenal Med 2014;4:12–21], Frederic T. Billings should read Frederic T. Billings IV.
